# Supplementary material for: Dietary Mg Supplementation Decreases Oxidative Stress, Inflammation, and Vascular Dysfunction in an Experimental Model of Metabolic Syndrome with Renal Failure
Source: MDPI journal article supplement (doi:10.3390/antiox12020283), 2023-01-27

## Article

# Dietary Mg supplementation decreases oxidative stress, inflammation, and vascular dysfunction in an experimental model of metabolic syndrome with renal failure

Rodrigo López-Baltanás<sup>1,\*</sup>, María Encarnación Rodríguez-Ortiz<sup>1,2,\*</sup>, Juan M. Díaz-Tocados<sup>3</sup>, Julio M. Martínez-Moreno<sup>1</sup>, Cristina Membrives<sup>1</sup>, Cristian Rodelo-Haad<sup>2,4</sup>, M Victoria Pendón Ruiz de Mier<sup>2,4</sup>, Mariano Rodríguez<sup>2,4</sup>, Antonio Canalejo<sup>5,\*</sup>, Yolanda Almadén<sup>1,†</sup>, Juan Rafael Muñoz-Castañeda<sup>2,4,‡</sup>

<sup>1</sup> Instituto Maimónides de Investigación Biomédica de Córdoba (IMIBIC), Reina Sofia University Hospital/University of Cordoba, Córdoba, Spain.

<sup>2</sup> Redes de Investigación Cooperativa Orientadas a Resultados en Salud (RICORS), Instituto de Salud Carlos III, Madrid, Spain.

<sup>3</sup> Biomedical Research Institute of Lleida (IRBLleida), Vascular and Renal Translational Research Group, Arnau de Vilanova University Hospital, Lleida, Spain

<sup>4</sup> Instituto Maimonides de Investigación Biomédica de Córdoba (IMIBIC), Reina Sofia University Hospital/University of Cordoba, Unidad de Gestión Clínica Nefrología, Córdoba, Spain

<sup>5</sup> Department of Integrated Sciences/Research Center on Natural Resources, Health and Environment (RENSMA), University of Huelva, Spain

\* Correspondence: Antonio Canalejo; e-mail: antonio.canalejo@dbasp.uhu.es;

+ Rodrigo López-Baltanás and Maria Encarnación Rodríguez-Ortiz should be considered joint first author.

‡ Yolanda Almadén and Juan R. Muñoz-Castañeda should be considered joint senior author.

- Supplementary Figure S1: Pathway enrichment of identified proteins.** A,C,E,F,H,J,L,N) show pathway enrichment of proteins identified in the different experimental groups. Pathway enrichment among differentially expressed proteins was conducted using pathway classifications from the Reactome resource. With the aim to search for proteins networking STRING protein network analysis was performed with the 22 proteins differentially expressed between groups. (B,D,G,I,K,M,O) show interaction of proteins in each studied pathway. Protein network analysis was performed by using STRING software.

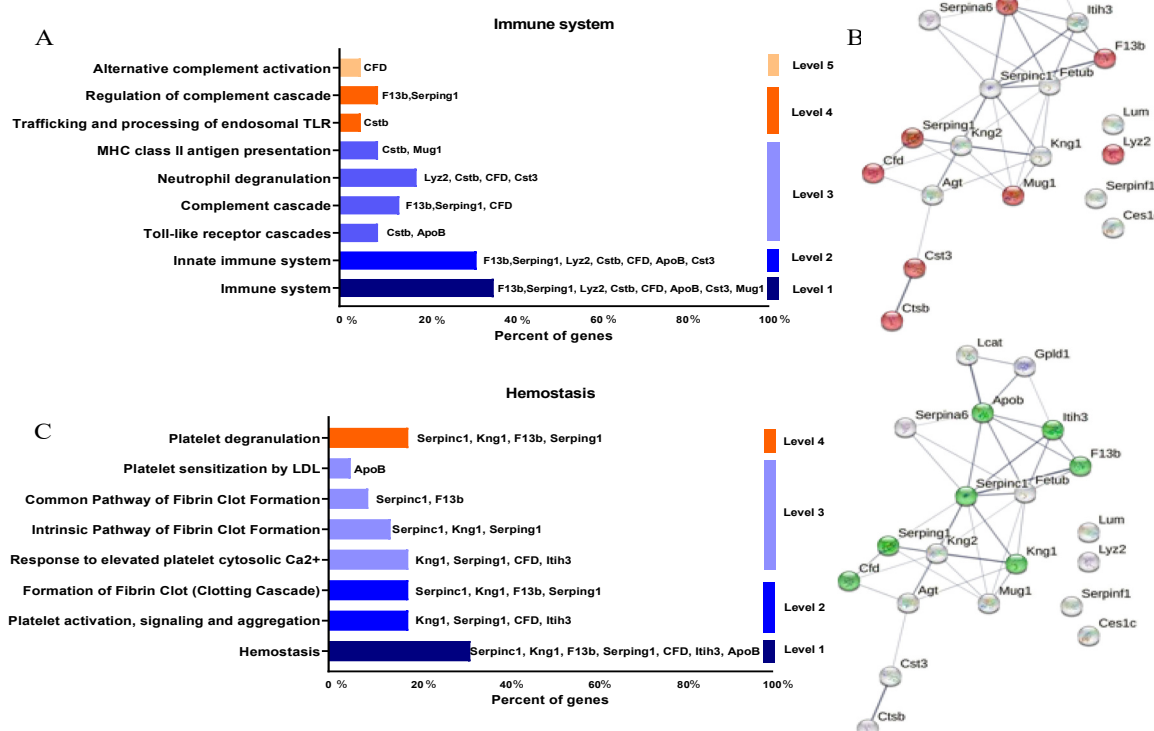

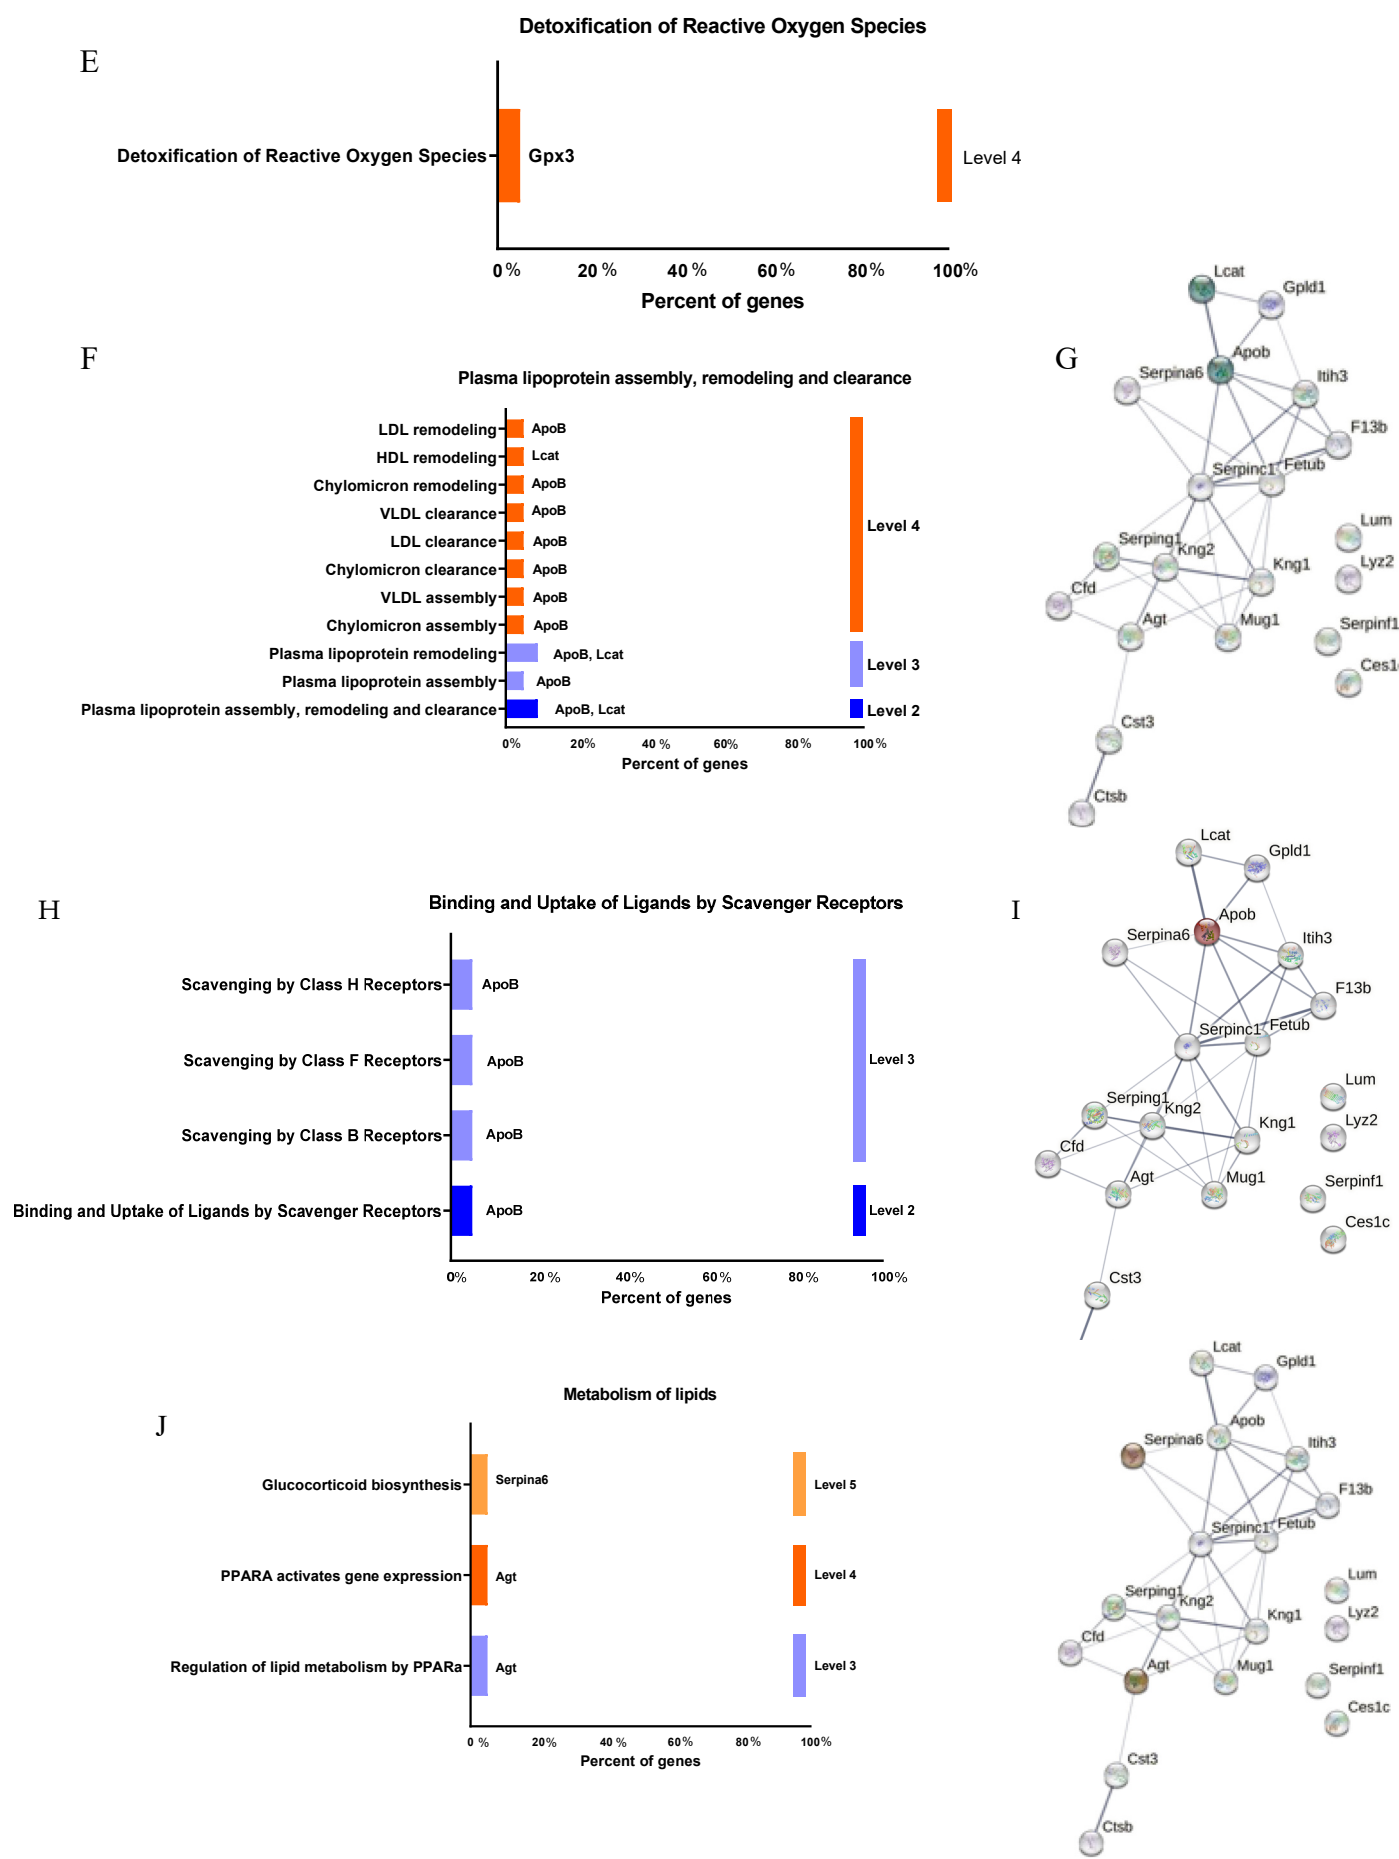

L

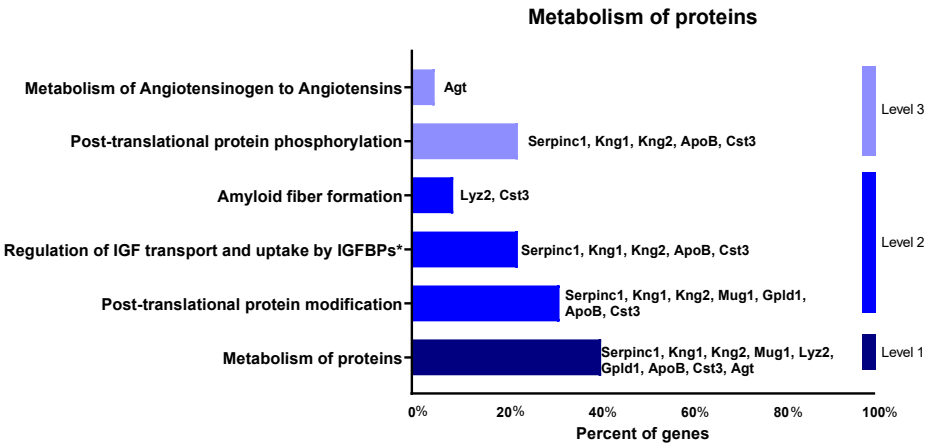

N

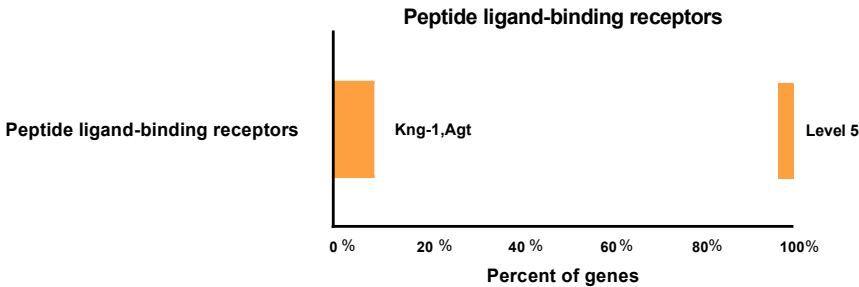

M

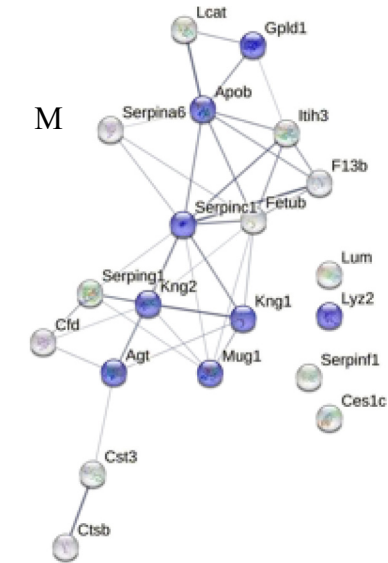

O

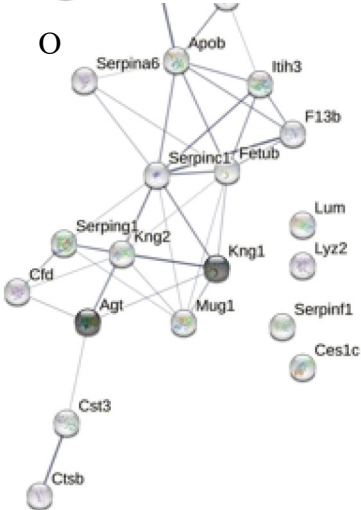

Supplement: s1 [file s1]
